# Supplementary material for: Immunoscore immune checkpoint using spatial quantitative analysis of CD8 and PD-L1 markers is predictive of the efficacy of anti- PD1/PD-L1 immunotherapy in non-small cell lung cancer
Source: PubMed Central journal article supplement — eBioMedicine. 2023 May 25;92:104633. doi: 10.1016/j.ebiom.2023.104633 (PMC10232659; doi:10.1016/j.ebiom.2023.104633), 2023-05-25
Supplement: mmc1.pdf [file mmc1.pdf]

Training set (Charlie/Delta Cohort)

| variables                | HR   | beta  | conf.low | conf.high | p.val   | p.val.signif |
|--------------------------|------|-------|----------|-----------|---------|--------------|
| Cd8.Tumor                | 0.60 | -0.51 | 0.44     | 0.82      | 0.00124 | **           |
| Cd8.Free.TR              | 0.60 | -0.51 | 0.43     | 0.82      | 0.00149 | **           |
| Cd8.Tumor_nn.20um.clust  | 0.70 | -0.36 | 0.55     | 0.88      | 0.00214 | **           |
| Cd8.Tumor_nn.20um.prox   | 0.69 | -0.37 | 0.54     | 0.88      | 0.00293 | **           |
| PDL1.Tumor_nn.20um.prox  | 0.70 | -0.36 | 0.55     | 0.88      | 0.00303 | **           |
| Cd8.TSI_nn.20um.prox     | 0.60 | -0.52 | 0.42     | 0.86      | 0.00508 | **           |
| PDL1.TSI_nn.20um.prox    | 0.61 | -0.50 | 0.42     | 0.87      | 0.00679 | **           |
| PDL1.Tumor_nn.20um.clust | 0.81 | -0.22 | 0.68     | 0.95      | 0.01140 | *            |
| PDL1.TSI_nn.20um.clust   | 0.76 | -0.28 | 0.59     | 0.97      | 0.02550 | *            |
| PDL1.TSI                 | 0.77 | -0.26 | 0.61     | 0.98      | 0.03480 | *            |
| Cd8.TSI_nn.20um.clust    | 0.78 | -0.25 | 0.61     | 0.99      | 0.04210 | *            |
| PDL1.Tumor               | 0.85 | -0.17 | 0.72     | 0.99      | 0.04270 | *            |
| Cd8.TSI                  | 0.70 | -0.35 | 0.49     | 1.00      | 0.05270 | ns           |
| Cd8.Free.TSI             | 0.71 | -0.35 | 0.49     | 1.02      | 0.06060 | ns           |
| TSI.TR_PDL1.d.ratio      | 1.05 | 0.05  | 0.98     | 1.12      | 0.15500 | ns           |
| TSI.TR_CD8d.ratio        | 1.01 | 0.01  | 1.00     | 1.02      | 0.16300 | ns           |

Univariate Cox  
Analysis on  
Continuous  
Variables (PFS)

| variables                | HR   | beta  | conf.low | conf.high | p.val   | p.val.signif |
|--------------------------|------|-------|----------|-----------|---------|--------------|
| Cd8.TSI_nn.20um.prox     | 0.35 | -1.10 | 0.19     | 0.63      | 0.00044 | ***          |
| Cd8.Tumor                | 0.46 | -0.78 | 0.31     | 0.68      | 0.00011 | ***          |
| Cd8.Tumor_nn.20um.prox   | 0.48 | -0.73 | 0.32     | 0.72      | 0.00035 | ***          |
| Cd8.Tumor_nn.20um.clust  | 0.48 | -0.73 | 0.33     | 0.71      | 0.00023 | ***          |
| PDL1.Tumor_nn.20um.prox  | 0.48 | -0.73 | 0.32     | 0.72      | 0.00035 | ***          |
| PDL1.TSI_nn.20um.prox    | 0.40 | -0.91 | 0.22     | 0.72      | 0.00220 | **           |
| PDL1.Tumor               | 0.56 | -0.58 | 0.38     | 0.82      | 0.00270 | **           |
| PDL1.Tumor_nn.20um.clust | 0.55 | -0.59 | 0.38     | 0.81      | 0.00270 | **           |
| Cd8.Free.TR              | 0.50 | -0.68 | 0.31     | 0.81      | 0.00450 | **           |
| TSI.TR_CD8d.ratio        | 2.40 | 0.89  | 1.30     | 4.60      | 0.00480 | **           |
| Cd8.TSI                  | 0.46 | -0.77 | 0.25     | 0.87      | 0.01600 | *            |
| Cd8.Free.TSI             | 0.48 | -0.74 | 0.26     | 0.88      | 0.01800 | *            |
| PDL1.TSI                 | 0.55 | -0.60 | 0.33     | 0.90      | 0.01700 | *            |
| PDL1.TSI_nn.20um.clust   | 0.56 | -0.58 | 0.34     | 0.91      | 0.01900 | *            |
| Cd8.TSI_nn.20um.clust    | 0.44 | -0.81 | 0.22     | 0.90      | 0.02400 | *            |
| TSI.TR_PDL1.d.ratio      | 1.40 | 0.36  | 0.84     | 2.40      | 0.19000 | ns           |

Univariate Cox  
Analysis on  
Dichotomized  
Variables (PFS)

Validation set (Mike Cohort)

| variables                | HR   | beta  | conf.low | conf.high | p.val    | p.val.signif |
|--------------------------|------|-------|----------|-----------|----------|--------------|
| Cd8.Tumor_nn.20um.clust  | 0.62 | -0.47 | 0.48     | 0.81      | 0.000543 | ***          |
| Cd8.Tumor                | 0.59 | -0.53 | 0.43     | 0.81      | 0.000997 | ***          |
| Cd8.Free.TR              | 0.59 | -0.53 | 0.43     | 0.81      | 0.001160 | **           |
| Cd8.Tumor_nn.20um.prox   | 0.63 | -0.47 | 0.46     | 0.85      | 0.002670 | **           |
| PDL1.Tumor_nn.20um.prox  | 0.64 | -0.45 | 0.47     | 0.86      | 0.003070 | **           |
| PDL1.Tumor               | 0.80 | -0.22 | 0.66     | 0.98      | 0.027400 | *            |
| Cd8.TSI_nn.20um.prox     | 0.68 | -0.38 | 0.48     | 0.97      | 0.032500 | *            |
| Cd8.TSI                  | 0.63 | -0.46 | 0.40     | 0.99      | 0.047400 | *            |
| PDL1.TSI_nn.20um.prox    | 0.69 | -0.36 | 0.48     | 1.00      | 0.047600 | *            |
| Cd8.Free.TSI             | 0.63 | -0.46 | 0.40     | 1.00      | 0.050900 | ns           |
| PDL1.TSI                 | 0.77 | -0.27 | 0.57     | 1.02      | 0.071700 | ns           |
| Cd8.TSI_nn.20um.clust    | 0.78 | -0.25 | 0.59     | 1.05      | 0.096900 | ns           |
| PDL1.Tumor_nn.20um.clust | 0.86 | -0.16 | 0.70     | 1.04      | 0.117000 | ns           |
| TSI.TR_PDL1.d.ratio      | 1.02 | 0.02  | 0.98     | 1.07      | 0.282000 | ns           |
| TSI.TR_CD8d.ratio        | 1.08 | 0.07  | 0.93     | 1.24      | 0.316000 | ns           |
| PDL1.TSI_nn.20um.clust   | 0.88 | -0.13 | 0.68     | 1.14      | 0.332000 | ns           |

Univariate Cox  
Analysis on  
Continuous  
Variables (PFS)

| variables                | HR   | beta  | conf.low | conf.high | p.val   | p.val.signif |
|--------------------------|------|-------|----------|-----------|---------|--------------|
| Cd8.Tumor_nn.20um.clust  | 0.41 | -0.88 | 0.28     | 0.62      | 1.6e-05 | ****         |
| Cd8.Tumor                | 0.42 | -0.86 | 0.28     | 0.64      | 5.3e-05 | ****         |
| PDL1.Tumor_nn.20um.prox  | 0.40 | -0.91 | 0.26     | 0.63      | 7.2e-05 | ****         |
| Cd8.Tumor_nn.20um.prox   | 0.44 | -0.81 | 0.29     | 0.68      | 2.1e-04 | ***          |
| Cd8.Free.TR              | 0.44 | -0.82 | 0.28     | 0.69      | 3.8e-04 | ***          |
| Cd8.TSI_nn.20um.prox     | 0.38 | -0.98 | 0.21     | 0.68      | 1.2e-03 | **           |
| PDL1.TSI_nn.20um.prox    | 0.38 | -0.96 | 0.21     | 0.69      | 1.6e-03 | **           |
| Cd8.TSI                  | 0.25 | -1.40 | 0.09     | 0.70      | 8.4e-03 | **           |
| Cd8.Free.TSI             | 0.25 | -1.40 | 0.09     | 0.70      | 8.4e-03 | **           |
| TSI.TR_PDL1.d.ratio      | 2.20 | 0.80  | 1.20     | 4.10      | 1.2e-02 | *            |
| Cd8.TSI_nn.20um.clust    | 0.30 | -1.20 | 0.11     | 0.82      | 2.0e-02 | *            |
| PDL1.Tumor_nn.20um.clust | 0.59 | -0.53 | 0.39     | 0.90      | 1.4e-02 | *            |
| PDL1.TSI                 | 0.49 | -0.72 | 0.27     | 0.89      | 1.9e-02 | *            |
| PDL1.Tumor               | 0.59 | -0.53 | 0.38     | 0.92      | 2.0e-02 | *            |
| PDL1.TSI_nn.20um.clust   | 0.49 | -0.71 | 0.26     | 0.92      | 2.6e-02 | *            |
| TSI.TR_CD8d.ratio        | 1.50 | 0.40  | 0.91     | 2.40      | 1.2e-01 | ns           |

Univariate Cox  
Analysis on  
Dichotomized  
Variables (PFS)

**Training set (Charlie/Delta Cohort)**

**A**

PDL1 status using cutoff = 1%

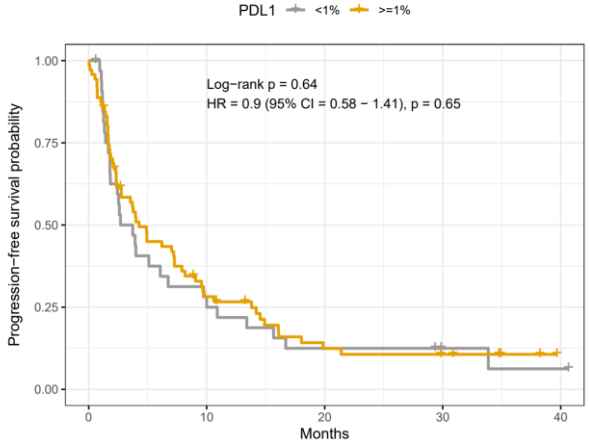

Number at risk (number censored)

|      |        |        |       |       |        |
|------|--------|--------|-------|-------|--------|
| <1%  | 33 (0) | 9 (1)  | 4 (1) | 2 (3) | 1 (3)  |
| >=1% | 71 (0) | 18 (4) | 7 (6) | 5 (7) | 0 (12) |

PDL1 status using cutoff = 1%

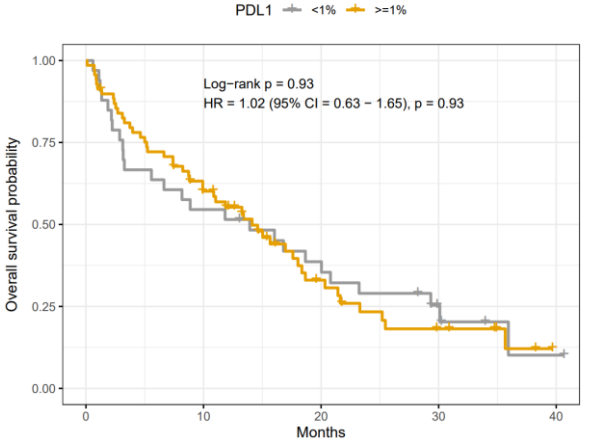

Number at risk (number censored)

|      |        |        |         |        |        |
|------|--------|--------|---------|--------|--------|
| <1%  | 33 (0) | 18 (0) | 12 (1)  | 5 (4)  | 1 (6)  |
| >=1% | 69 (0) | 38 (4) | 14 (14) | 6 (16) | 0 (21) |

**Validation set (Mike Cohort)**

**B**

PDL1 status using cutoff = 1%

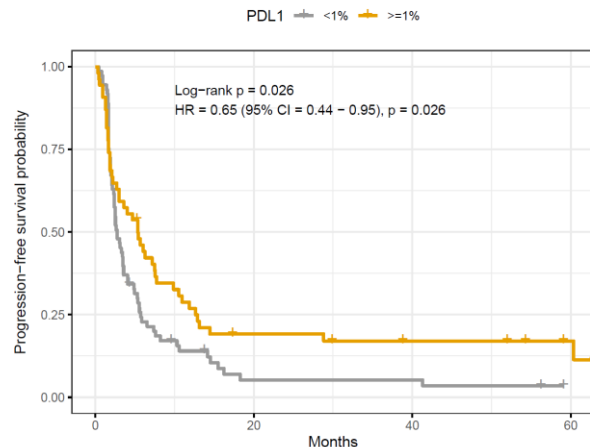

Number at risk (number censored)

|      |        |       |       |       |
|------|--------|-------|-------|-------|
| <1%  | 73 (0) | 3 (3) | 3 (3) | 0 (5) |
| >=1% | 54 (0) | 9 (2) | 6 (4) | 3 (7) |

PDL1 status using cutoff = 1%

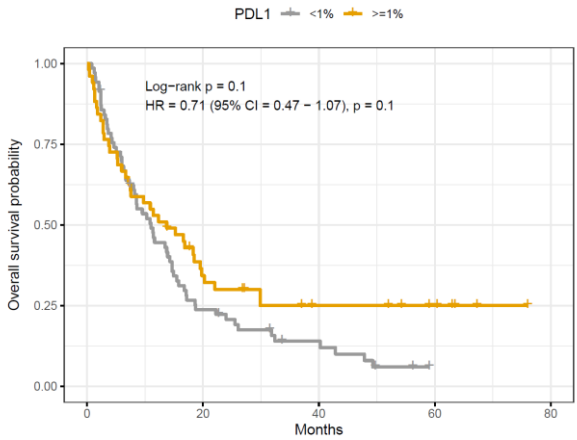

Number at risk (number censored)

|      |        |        |       |       |        |
|------|--------|--------|-------|-------|--------|
| <1%  | 70 (0) | 16 (2) | 7 (5) | 0 (8) | 0 (8)  |
| >=1% | 51 (0) | 16 (2) | 8 (6) | 5 (9) | 0 (14) |

Figure S3

### Training set (Charlie/Delta Cohort)

C

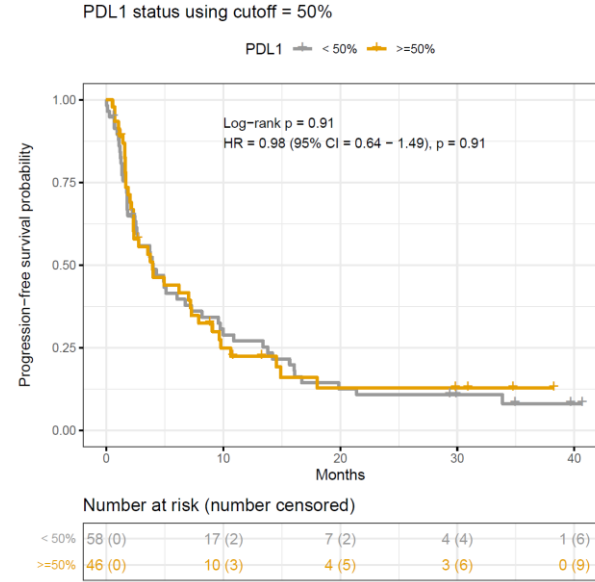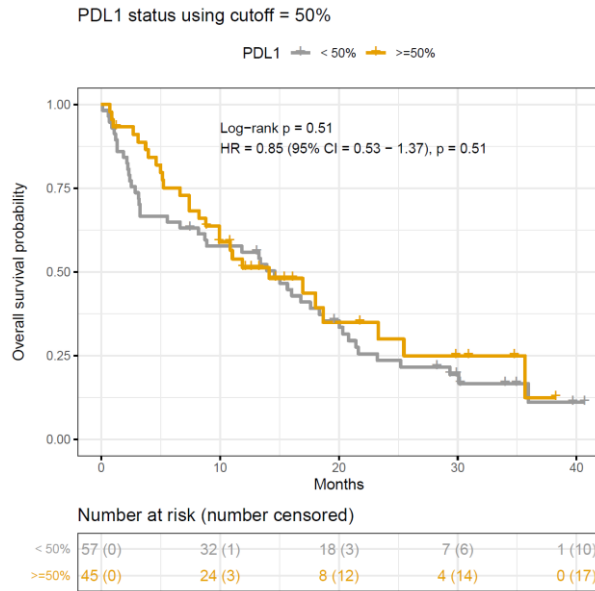

### Validation set (Mike Cohort)

D

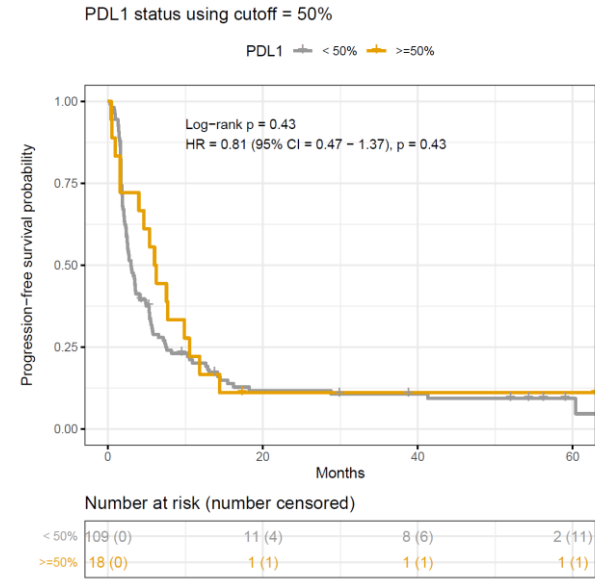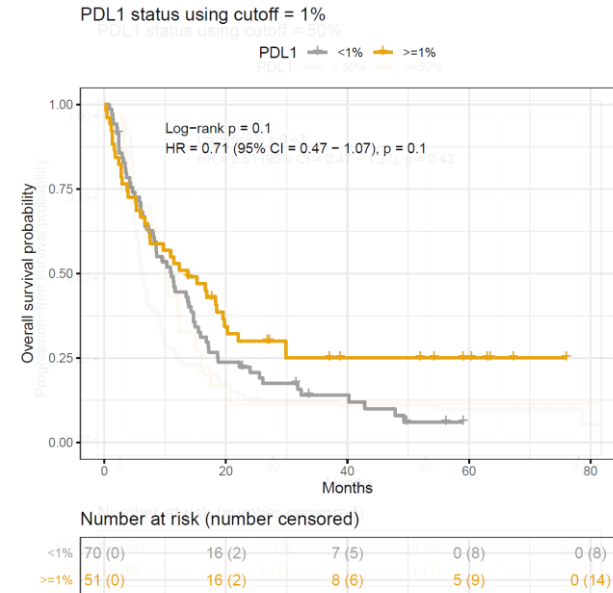

Figure S3

### Training set (Charlie/Delta Cohort)

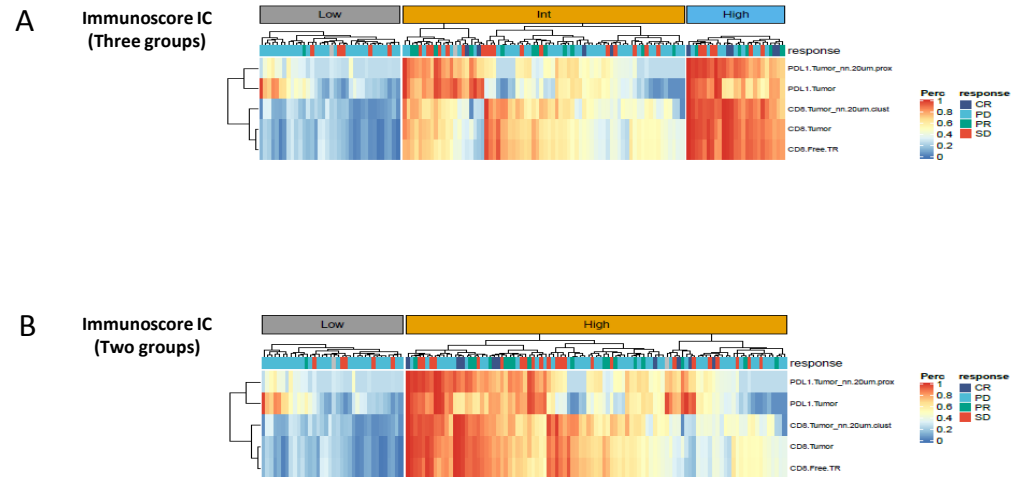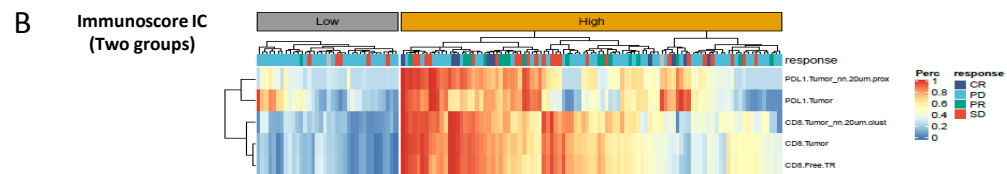

### Validation set (Mike Cohort)

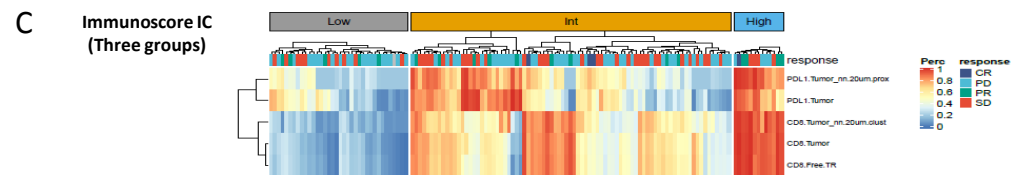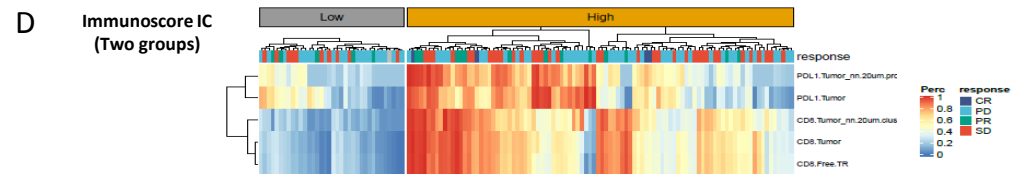

Figure S4

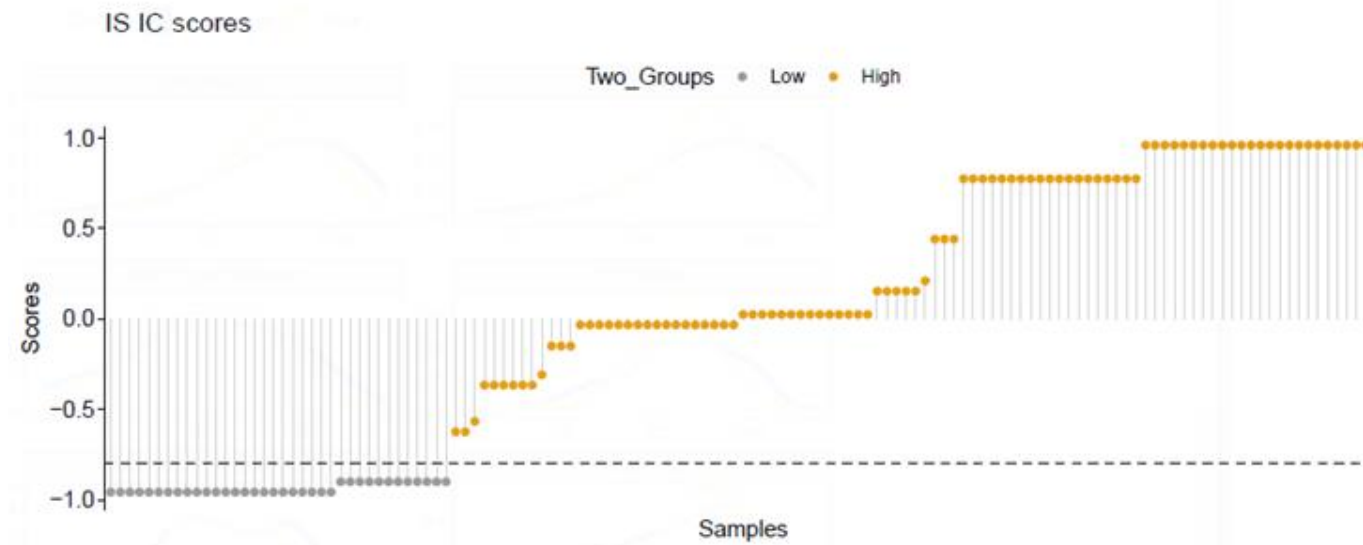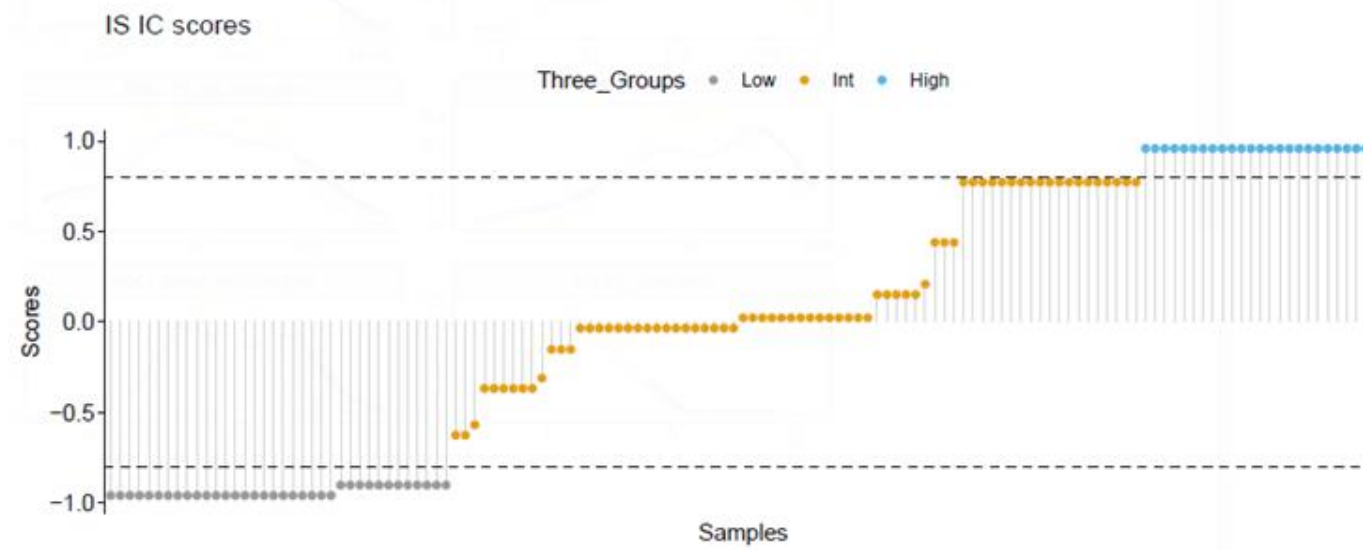

Figure S5

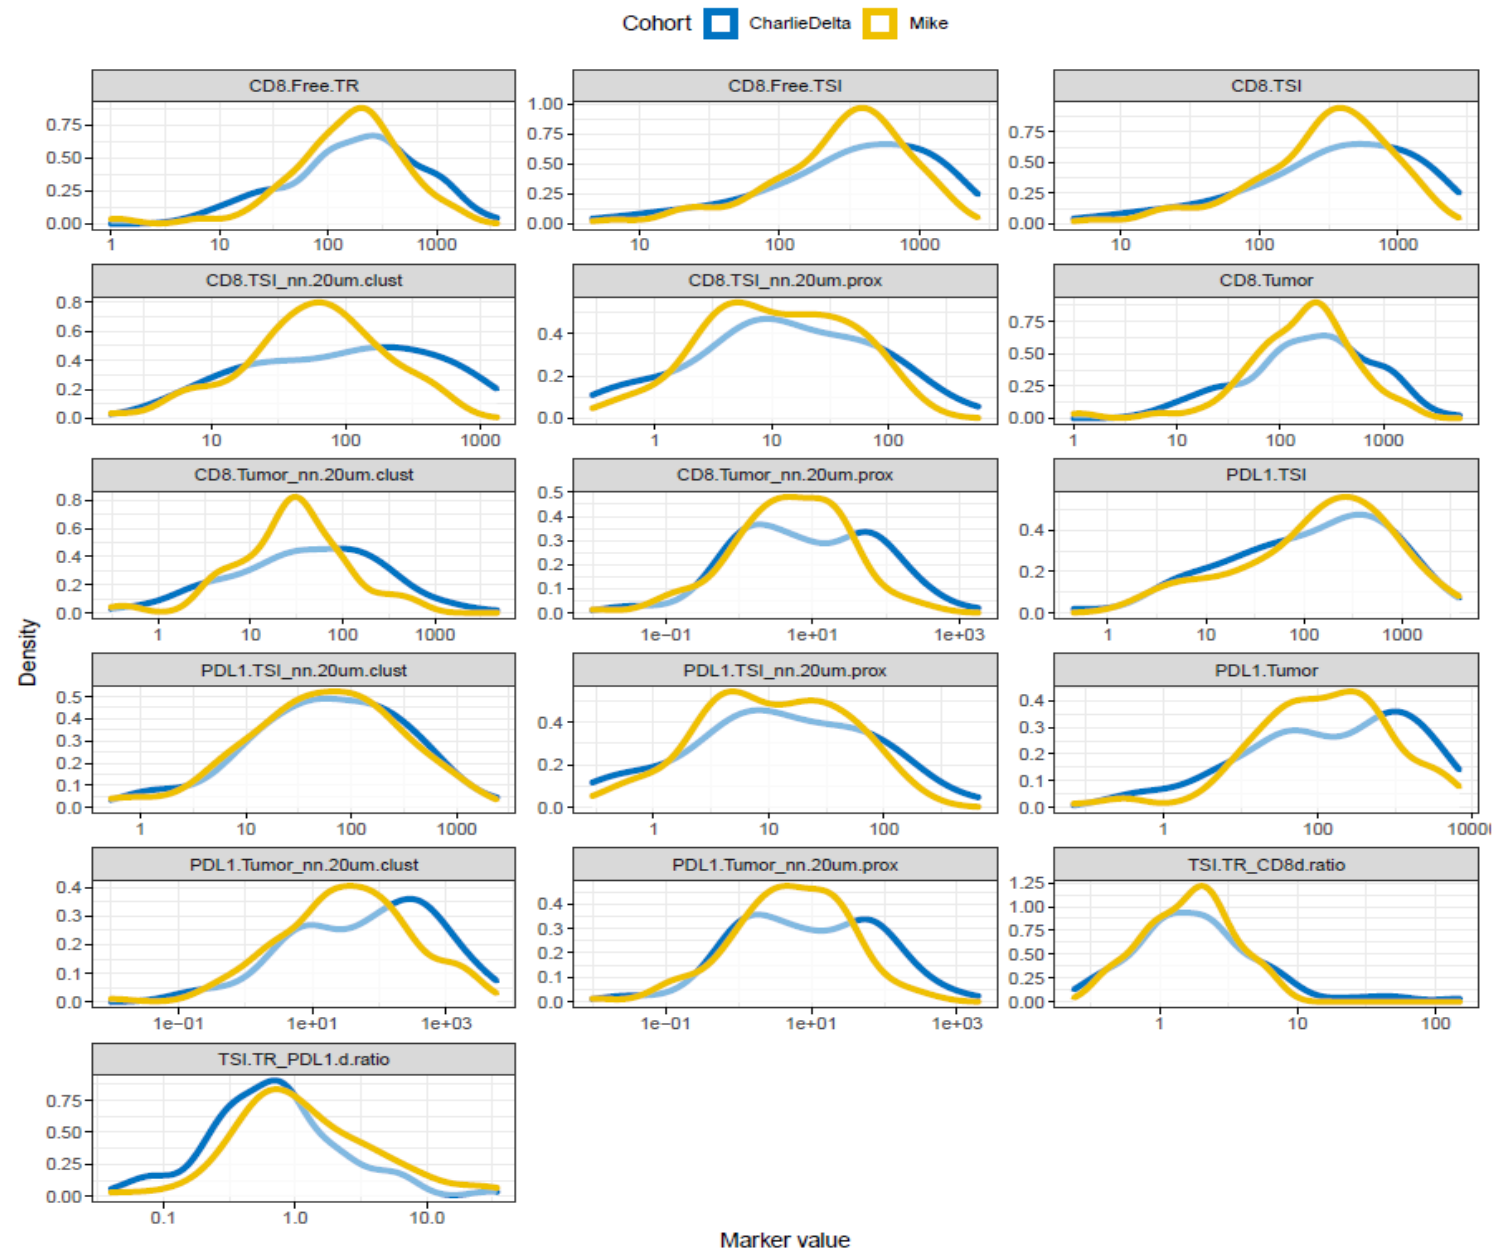

Figure S6
