# Supplementary material for: Immunoscore immune checkpoint using spatial quantitative analysis of CD8 and PD-L1 markers is predictive of the efficacy of anti- PD1/PD-L1 immunotherapy in non-small cell lung cancer
Source: PubMed Central journal article supplement — eBioMedicine. 2023 May 25;92:104633. doi: 10.1016/j.ebiom.2023.104633 (PMC10232659; doi:10.1016/j.ebiom.2023.104633), 2023-05-25
Supplement: mmc2.pdf [file mmc2.pdf]

**SUPPLEMENTARY FIGURE LEGENDS**

**Supplementary Figure S1. Proximity between cells of interest detected by Digital Pathology.** (A) Examples of the distribution of PD-L1+ cells and CD8+ cells within the tumor microenvironment. (B) Example of dual staining obtained with Immunoscope IC test, raw image, top left. Automatic detection of cells and identification of PD-L1+ cells (blue nucleus and brown plasma membrane) and CD8+ cells (purple nucleus and grey plasma membrane), top right. Materialization of a 20µm circle around the centroid of two PD-L1+ cells, bottom left. Identification (red nucleus) of a PD-L1+ cell with at least one CD8+ within a 20µm around its centroid, bottom right. (C) Distribution of the proximity index in 132 NSCLC patients from the Charlie/Delta cohort.

**Supplementary Figure S2. Univariate Cox analysis on continuous or dichotomized variables of the progression free survival (PFS).** Upper panel: Training set, Lower panel: validation set. Variables measured in the Tumor Stroma Interface (TSI) are reported but were not used to establish the Immunoscope IC model since that compartment was missing in more than a third of the biopsy samples. Significant logrank P-values are marked as \*\*\*  $p < 0.005$ , \*\*  $0.005 > p < 0.01$ , \*  $0.01 > p < 0.05$ .

**Supplementary Figure S3. PD-L1 TPS is not associated with improved PFS or OS of patients** (A, B) Kaplan-Meier curves describing PFS at 1% PD-L1 TPS on the training set and the validation set respectively (C, D) Kaplan-Meier curves describing PFS at 50% PD-L1 TPS on the training set and the validation set respectively.

**Supplementary Figure S4. Hierarchical clustering of patients according to the five variables contributing to the LASSO model.** (A) Training set in three-category Immunoscope-IC. (B) Training set in two-category Immunoscope-IC, (C) Validation set in three-category Immunoscope-IC, (D) Validation set in two-category Immunoscope-IC.

**Supplementary Figure S5. Distribution of Immuscore-IC in the training cohort.** Dashed lines represent the cutoffs used to dichotomize the score into two- (top panel) or three-category (bottom panel) Immunoscore IC.

**Supplementary Figure S6. Distributions of variables measured in Immunoscore-IC test.** The figure shows the distribution of variables in both training and test cohorts. The x-axis (in log scale) represents marker values and the y-axis indicates the density distribution.
